# Supplementary material for: Recruitment of Upper-Limb Motoneurons with Epidural Electrical Stimulation of the Primate Cervical Spinal Cord
Source: bioRxiv or medRxiv preprint supplement (doi:10.1101/2020.02.17.952796), 2020-02-18
Supplement: Supplementary file [file media-1.pdf]

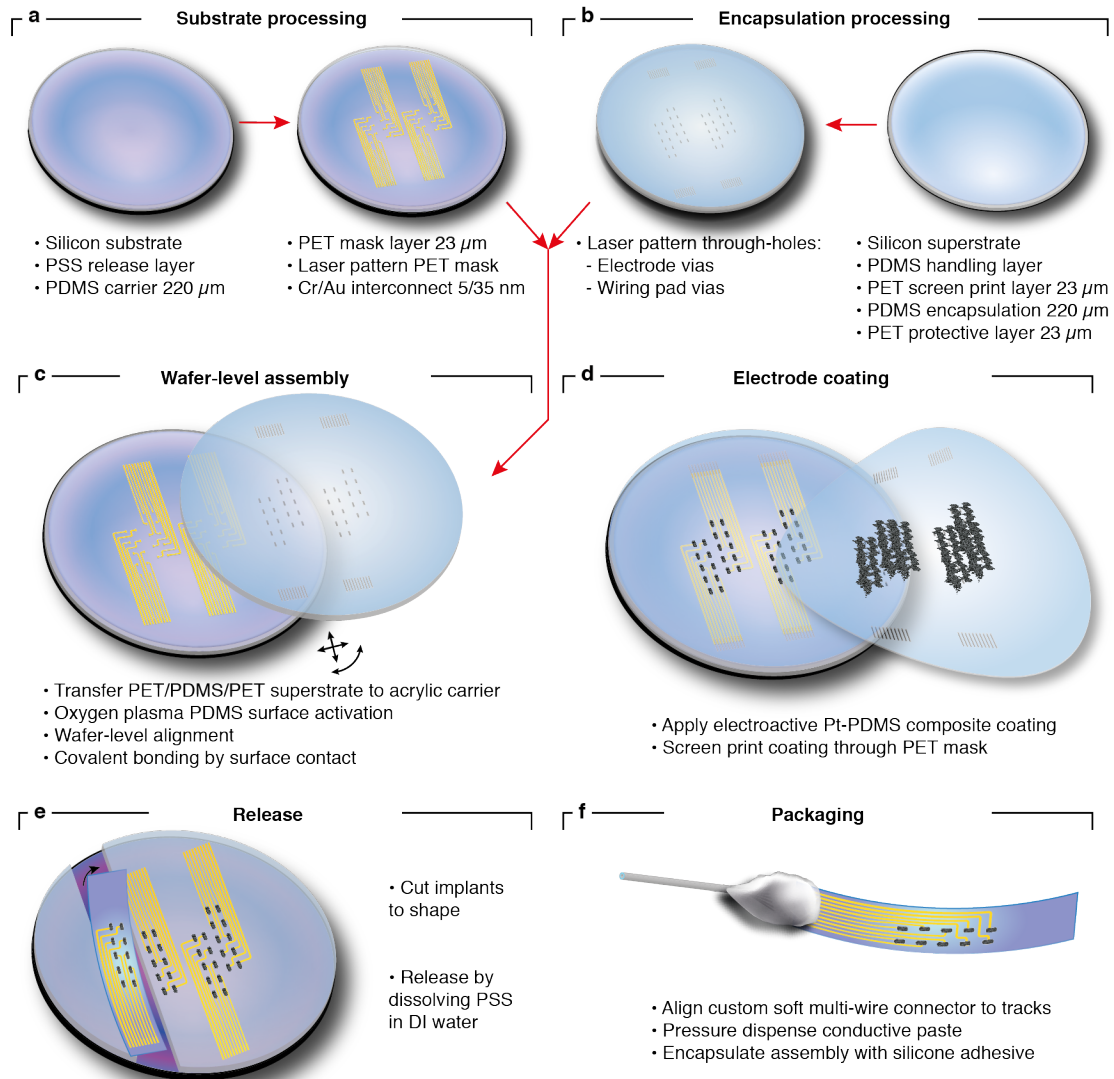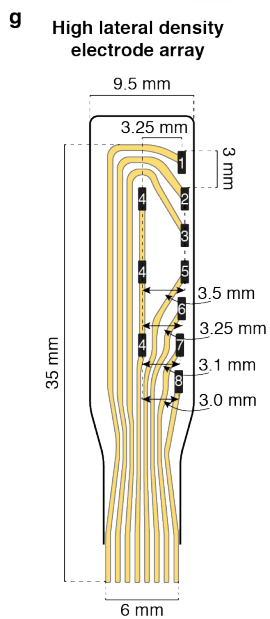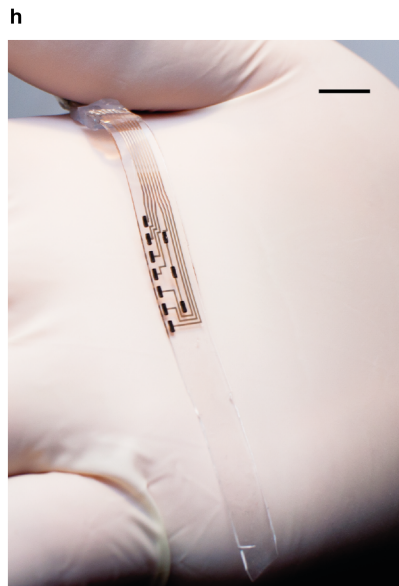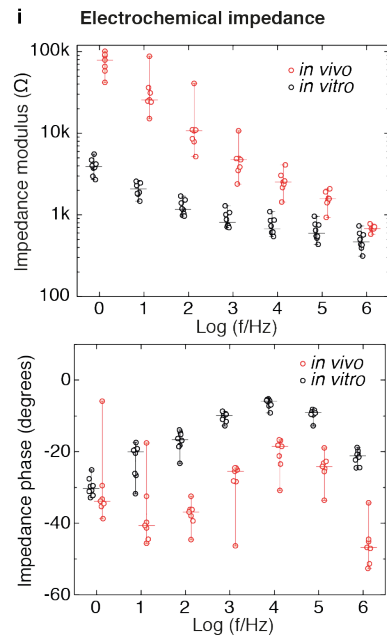

**Supplementary Figure 1. Electrode array technology. a-f** Process flow for the fabrication of soft implants on silicon wafers. **a** Substrate processing with the deposition of the stretchable interconnect. **b** Encapsulation processing with the laser micromachining of through-vias. **c** Assembly by covalent bonding of the PDMS substrate and encapsulation. **d** Screen printing of the electrode coating. **e** Implant release from the silicon wafer. **f** Wiring and packaging of the implant. Electrode arrays for cervical neuromodulation. **g** Custom layout of an electrode array with 7 lateral and 1 medial (split in three pieces) electrode contacts (design 2) tailored to the monkey cervical spinal cord. **e** Photograph of a cervical soft electrode array with lateral electrode placement. Scale bar: 1 cm. **f** Electrochemical impedance spectrum acquired on an electrode array implanted in a monkey. Data points are shown at frequencies  $f_i = 10^i$ , where  $i = 0, 1, \dots, 6$ . Black data points: data *in vitro*,  $n = 8$  electrodes. Red data points: data *in vivo*,  $n = 7$  electrodes. Horizontal bars: means. Whiskers: minima-maxima.

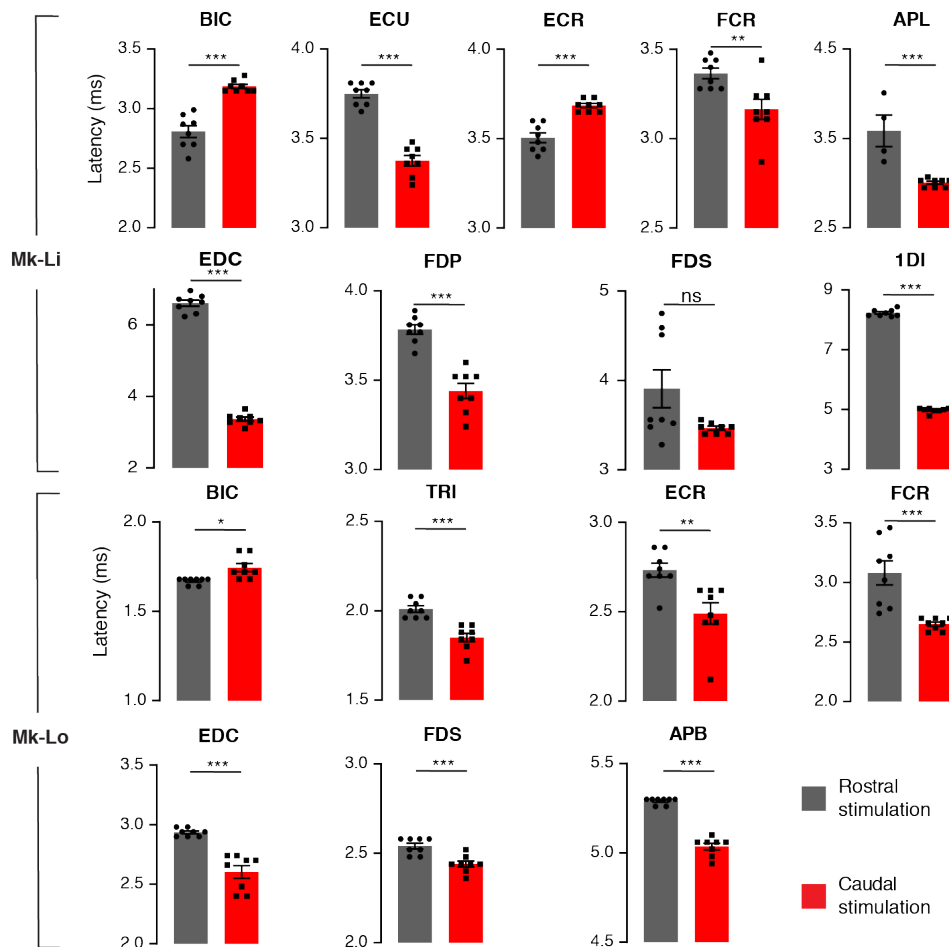

**Supplementary Figure 2. Latency analysis of muscular responses elicited by medial stimulation.** *Top:* latencies of muscular responses recorded in monkey Mk-Li. *Bottom:* latencies of muscular responses recorded in monkey Mk-Lo. For both, all muscles candidate for the analysis were included, and the latencies of 8 responses evoked at stimulation intensities close to motor threshold for one rostral medial and one medial caudal electrode contacts were retained (see Methods). Black-filled circles and squares: data points. Colored rectangles and black bars: means  $\pm$  SEMs.

**Table 1.** Estimated characteristics of the connectivity between Ia-afferents and motoneurons in 8 upper-limb muscles of the monkey. DEL: deltoid. BIC: biceps. TRI: triceps. EDC: extensor digitorum communis. ECR: extensor carpi radialis. FDS: flexor digitorum superficialis. FCR: flexor carpi radialis. APB: abductor policis brevis.

| <b>Muscle</b> | <b>Ia-fiber headcount</b> | <b>Mean number of synapses per motoneuron</b> | <b>Synaptic conductance [pS]</b> | <b>Total conductance per motoneuron [pS]</b> |
|---------------|---------------------------|-----------------------------------------------|----------------------------------|----------------------------------------------|
| DEL           | 68                        | 578                                           | 9.625                            | 5560                                         |
| BIC           | 119                       | 1036                                          | 5.0                              | 5180                                         |
| TRI           | 193                       | 1681                                          | 3.375                            | 5675                                         |
| EDC           | 82                        | 699                                           | 7.625                            | 5330                                         |
| ECR           | 65                        | 555                                           | 10.5                             | 5830                                         |
| FDS           | 132                       | 1157                                          | 5.75                             | 6650                                         |
| FCR           | 48                        | 408                                           | 15.375                           | 6275                                         |
| APB           | 30                        | 250                                           | 28.5                             | 7125                                         |

**Table 2.** Identification information, characteristics, type of procedure performed, and license numbers of the monkeys involved in the study.

| <b>Animal ID</b> | <b>Authorization number</b> | <b>Sex</b> | <b>Age</b> | <b>Weight</b> | <b>Procedure</b> |
|------------------|-----------------------------|------------|------------|---------------|------------------|
| Mk-Ca            | 2014_42E_FR                 | Female     | 11 years   | 5.8 kg        | Terminal         |
| Mk-Li            | 2017_03_FR                  | Male       | 12 years   | 7.6 kg        | Terminal         |
| Mk-Cs            | 2017_04E_FR                 | Female     | 9 years    | 4.3 kg        | Survival         |
| Mk-Lo            | 2014_42E_FR                 | Female     | 9 years    | 4.0 kg        | Terminal         |
| Mk-Sa            | 2017_04E_FR                 | Female     | 7 years    | 4.4 kg        | Survival         |
